# Supplementary material for: Sodium channel β1 subunits participate in regulated intramembrane proteolysis-excitation coupling
Source: PubMed Central journal article supplement (PMC7934843; doi:10.1172/jci.insight.141776), 2021-02-08
Supplement: jciinsight-6-141776-s244.pdf [file jciinsight-6-141776-s244.pdf]

## Supplemental Data

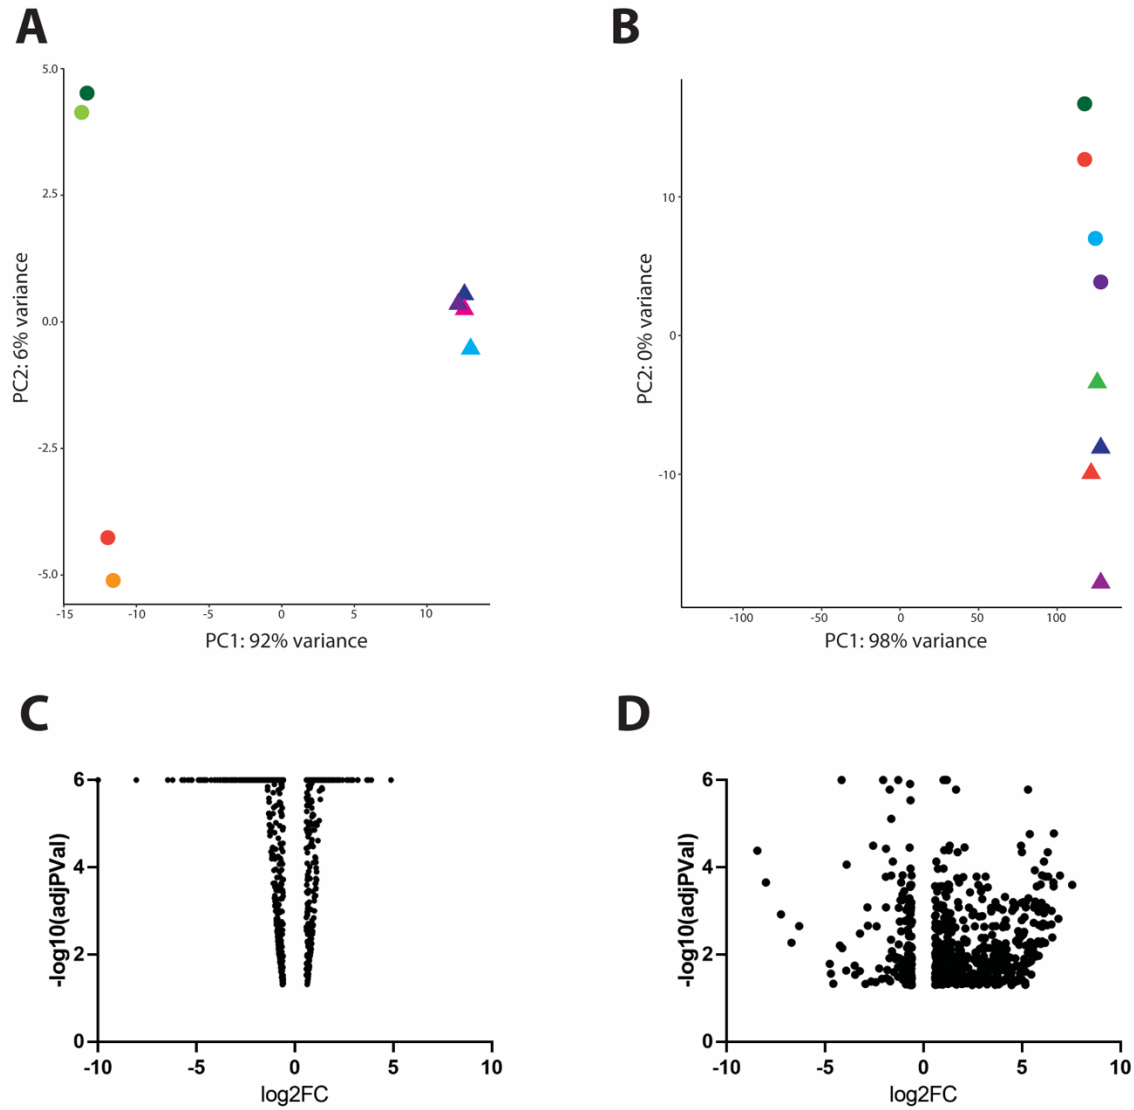

**Supplemental Figure 1.** Principal Component Analysis (PCA) and Volcano plots for RNA-Seq experiments. Volcano plots display only data points with a fold-change of 1.5 or greater and an adjusted p-value of less than 0.05. **A.** CHL cells stably overexpressing eGFP only ( $\blacktriangle$ ) or  $\beta$ 1-ICD-V5-2A-eGFP ( $\bullet$ ) samples bin according to genotype. **B.** *Scn1b* WT ( $\blacktriangle$ ) and *Scn1b* null ( $\bullet$ ) P10 mouse cardiac ventricle bin according to genotype. **C.** RNA-Seq volcano plot for CHL cells stably overexpressing eGFP only or  $\beta$ 1-ICD-V5-2A-eGFP. **D.** RNA-Seq volcano plot for P10 WT and *Scn1b* null cardiac ventricle.

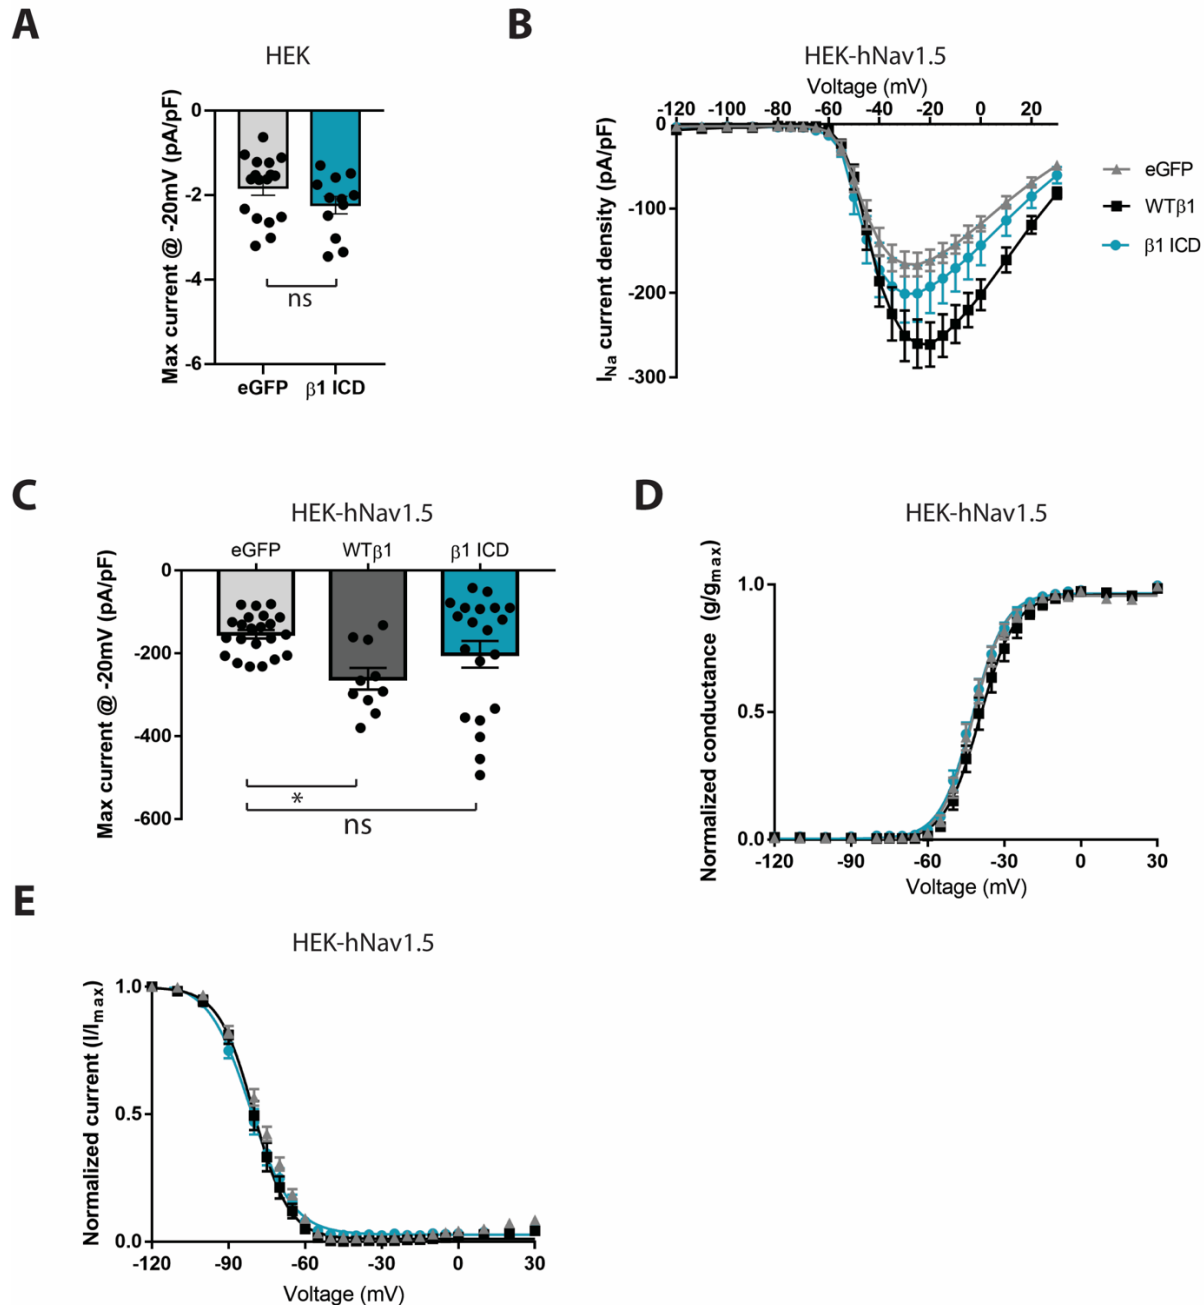

**Supplemental Figure 2.**  $\beta$ 1-ICD has no effect on sodium current in heterologous cells.

**A.** Expression of  $\beta$ 1-ICD-V5-2A-eGFP does not increase sodium current density in HEK cells compared to control, eGFP-only. N=12-17 per condition. **B.** Sodium current density is increased when WT  $\beta$ 1-V5-2A-eGFP is co-expressed with hNav<sub>v</sub>1.5 compared to eGFP-only control. Co-expression with  $\beta$ 1-ICD-V5-2A-eGFP does not increase sodium current density compared to eGFP-only control. **C.** Maximal current is increased when WT  $\beta$ 1-V5-2A-eGFP, but not  $\beta$ 1-ICD-V5-2A-eGFP, is co-expressed with hNav<sub>v</sub>1.5 compared to eGFP control. **D.** Co-expression of WT  $\beta$ 1-V5-2A-eGFP or  $\beta$ 1-ICD-V5-2A-eGFP has no effect on the voltage-dependence of sodium current activation compared to eGFP control. **E.** Co-expression of WT  $\beta$ 1-V5-2A-eGFP or  $\beta$ 1-ICD-V5-2A-eGFP has no effect on the voltage-dependence of sodium current inactivation compared to eGFP control. N=10-24 per condition. The voltage-dependence of activation and inactivation

were compared using nonlinear fit. Max current was compared using Student's t-test or one-way ANOVA. Data are represented as the mean  $\pm$  SEM.

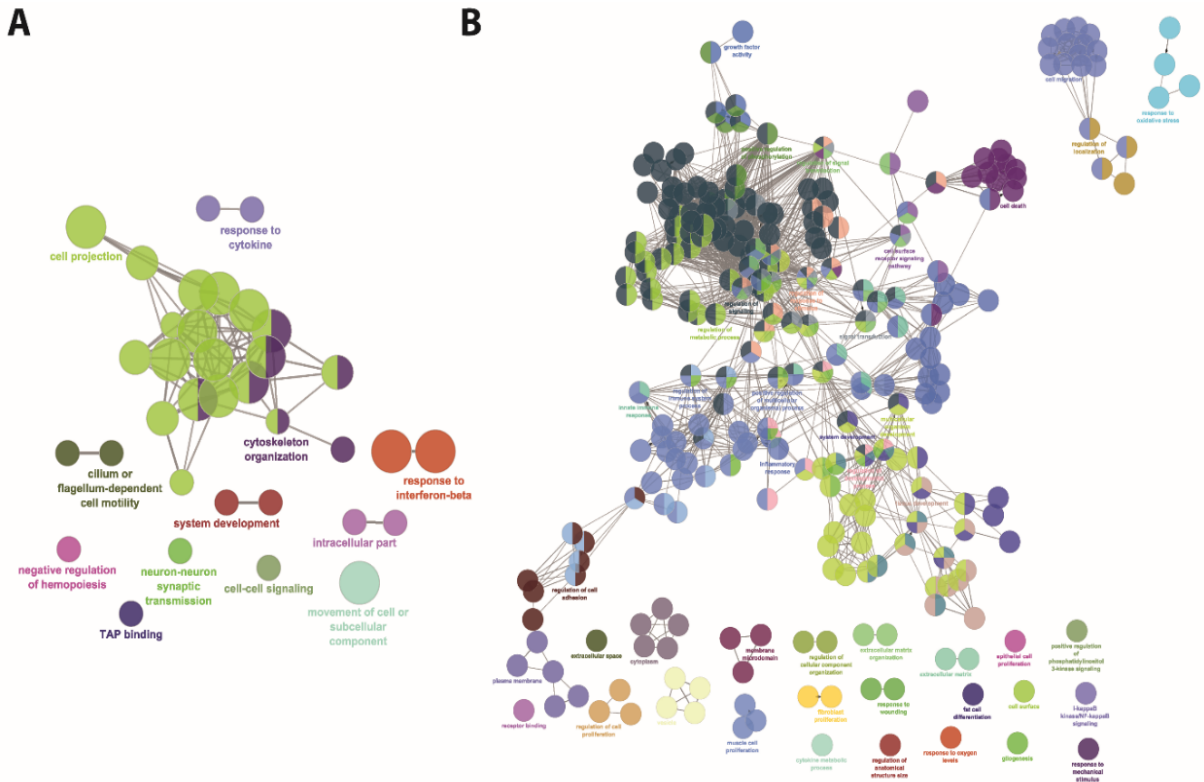

**Supplemental Figure 3.** ClueGO network analysis of RNA-Seq data sets. **A.** ClueGO network analysis for *Scn1b* WT vs. *Scn1b* null cardiac ventricle RNA-seq for GO groups with an adjusted p-value  $\leq 0.05$ . **B.** ClueGO network analysis for CHL cells stably overexpressing eGFP or the  $\beta 1$ -ICD and eGFP for GO groups with an adjusted p-value  $\leq 0.0001$ .

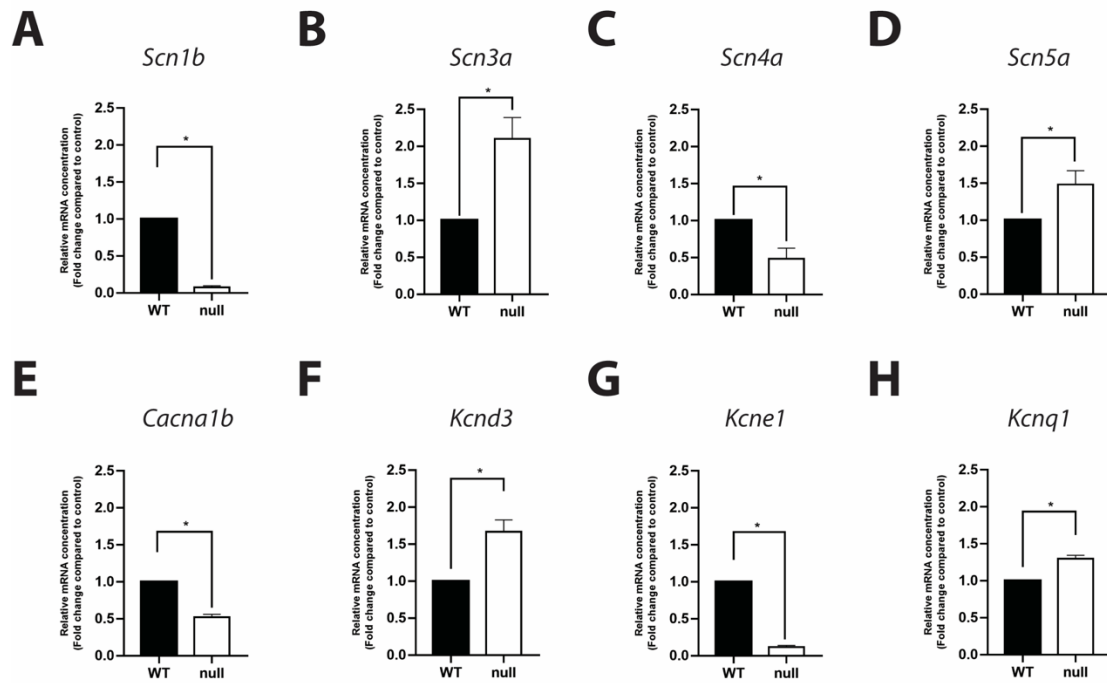

**Supplemental Figure 4:** RT-qPCR analysis of ion channel genes from P16-P17 WT and *Scn1b* null cardiac ventricle. Statistical significance was determined using Student's T-test (p-value < 0.05). **A.** Relative expression of *Scn1b* (confirmation of *Scn1b* deletion). **B.** Relative expression of *Scn3a*. **C.** Relative expression of *Scn4a*. **D.** Relative expression of *Scn5a*. **E.** Relative expression of *Cacna1b*. **F.** Relative expression of *Kcnd3*. **G.** Relative expression of *Kcne1*. **H.** Relative expression for *Kcnq1*. Data are represented as the mean  $\pm$  SEM.

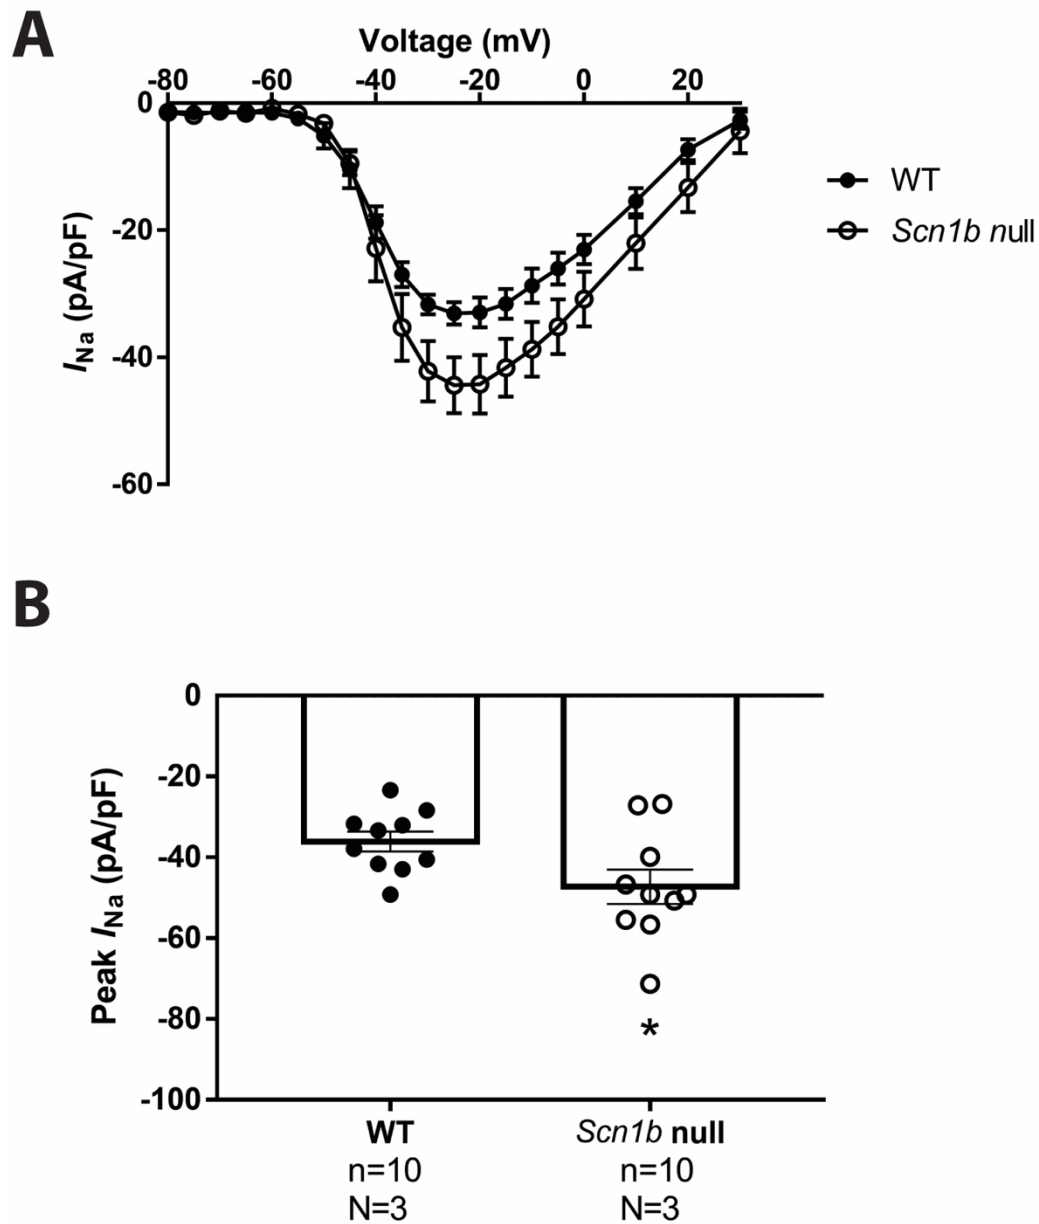

**Supplemental Figure 5:** Sodium current density is increased in acutely isolated P16-17 *Scn1b* null cardiac ventricular myocytes (open circles) compared to WT (closed circles). **A.** Current-voltage relationship. **B.** Maximal current density (pA/pF). The voltage-dependence of activation and inactivation were compared using nonlinear fit. Max current was compared using Student's t-test or one-way ANOVA. Data are represented as the mean  $\pm$  SEM.

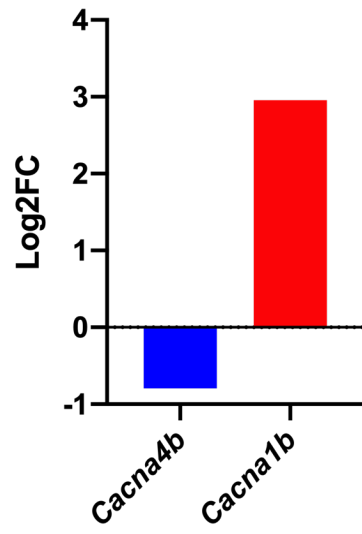

**Supplemental Figure 6.** RNA-Seq analysis showing changes in voltage-gated calcium channel  $\beta$  subunit genes. Blue bar: ICD overexpression experiment. Red bar: *Scn1b* deletion. N=4.

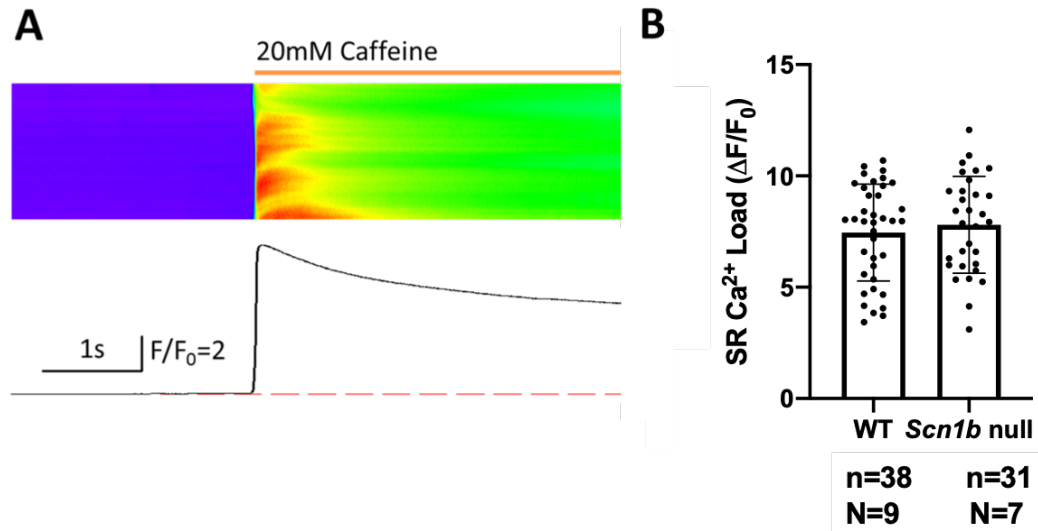

**Supplemental Figure 7.** Sarcoplasmic reticulum (SR)  $\text{Ca}^{2+}$  content is similar in acutely isolated P16-17 *Scn1b* null and WT ventricular cardiac myocytes. **A.** Representative example of SR  $\text{Ca}^{2+}$  content measurement. **B.** Student's t-test showed no difference in SR  $\text{Ca}^{2+}$  content between genotypes. N: number of mice; n: number of cells. Data are represented as the mean  $\pm$  SEM.



|                            | Transient $I_{Na}$ density (pA/pF) | Persistent $I_{Na}$ density (pA/pF) |
|----------------------------|------------------------------------|-------------------------------------|
| <b>hNav1.5 alone</b>       | -156.8±30.2                        | -0.9±0.2                            |
| <b>hNav1.5+ICD peptide</b> | -177.6±29.5                        | -0.6±0.2                            |

**Supplemental Table 1.** Application of  $\beta$ 1-ICD peptide through the patch pipet had no effect on hNav1.5-generated transient or persistent sodium current ( $I_{Na}$ ) density. Statistical significance was determined using student's t-test. N=8-10 cells per condition.

|                                       | Voltage dependence |               |                |                |                |            | n  |
|---------------------------------------|--------------------|---------------|----------------|----------------|----------------|------------|----|
|                                       | Activation         |               |                | Inactivation   |                |            |    |
|                                       | $G_{max}$ (nS)     | $k$ (mV)      | $V_{1/2}$ (mV) | $h$ (mV)       | $V_{1/2}$ (mV) | C          |    |
| <b>hNa<sub>v</sub>1.5</b>             | 1.95±0.4<br>2      | 6.56±0.4<br>7 | -<br>42.7±1.6  | -<br>9.25±0.42 | -<br>88.7±4.6  | 0.02±0.005 | 8  |
| <b>hNa<sub>v</sub>1.5+ICD peptide</b> | 2.16±0.3<br>2      | 5.87±0.3<br>1 | -<br>44.2±1.1  | -<br>9.05±0.35 | -<br>85.9±2.2  | 0.02±0.003 | 10 |

**Supplemental Table 2.** Application of the  $\beta$ 1-ICD peptide through the patch pipet had no effect on the voltage-dependence of activation or inactivation of hNa<sub>v</sub>1.5-generated sodium current. The voltage-dependence of activation and inactivation were compared using nonlinear fits. N=8-10 cells p
